# Supplementary material
Source: Research Square preprint supplement (doi:10.21203/rs.3.rs-9533905/v1)
Supplement: Supplementary file 1 [file c6cb8195f75a9d48dfeb1ddc.docx]

**Plain Language Summary**

**Background** This study aimed to investigate the postnatal trajectories of systemic inflammatory markers, including the neutrophil-to-lymphocyte ratio (NLR), platelet-to-lymphocyte ratio (PLR), and systemic immune-inflammation index (SII), in Very preterm infants (VPI), and to assess their predictive value for bronchopulmonary dysplasia (BPD).

**Methods** In this retrospective cohort study, 431 VPI (gestational age <32 weeks) admitted between January 2018 and December 2022 were included. Infants were categorized into BPD (n=114) and non-BPD (n=317) groups. Complete blood count (CBC) data were collected on postnatal days 1, 3, 7, 14, and 21 to calculate the NLR, PLR, and SII. Multivariable logistic regression was used to evaluate the associations between these markers and BPD, while generalized estimating equations (GEE) were employed to assess longitudinal trajectories. Receiver operating characteristic (ROC) curves were used to determine predictive efficacy.

**Results** The NLR levels across several postnatal time points were significantly elevated in the BPD group compared with the non-BPD group. After adjusting for gestational age, birth weight, cesarean delivery, surfactant use, hemodynamically significant patent ductus arteriosus (hs-PDA), and prolonged mechanical ventilation, multivariable logistic regression identified postnatal day 14 NLR as an independent risk factor for BPD (OR = 4.147; 95%CI: 1.427–12.053; P=0.009). GEE analysis demonstrated that the longitudinal evolution of the NLR was significantly associated with BPD development. ROC curve analysis revealed that day 21 NLR exhibited the highest predictive capacity for BPD, with an AUC of 0.710 (95% CI: 0.651–0.768) and an optimal cutoff of 0.890. Following multivariable adjustment, the high-NLR group remained an independent predictor of BPD.

**Conclusion** The postnatal evolution of the NLR is intimately associated with the development of BPD in VPI. Day 21 NLR serves as a robust predictive marker for BPD, offering a facile and reliable tool for early clinical risk stratification.
