# Supplementary material
Source: Research Square preprint supplement (doi:10.21203/rs.3.rs-9533905/v1)
Supplement: Supplementary file 2 [file e4e38b40f2e44d236b98502f.docx]

## **Author information**

| First Name and Middle Initial(s) | Last Name | Email address | Role |
| --- | --- | --- | --- |
| Liping | Xu | zzsyxlp@163.com | co-author |
| Shuzhen | Dai | zzsyydsz@163.com | co-author |
| Ruiyuan | Xu | 15859622153@163.com | co-author |
| Jingyuan | Lan | 2350719862@qq.com | co-author |
| Xuezhen | Wang | wangxuezhen@163.com | co-author |
| Guangmin | Lin | lgmxlp@126.com | corresponding author |
